# Supplementary material for: IE1 of Human Cytomegalovirus Inhibits Necroptotic Cell Death via Direct and Indirect Modulation of the Necrosome Complex
Source: MDPI journal article supplement (doi:10.3390/v16020290), 2024-02-13
Supplement: s1 [file s1]

Table S1: Sequences of oligonucleotides used for cloning and RT-qPCR analysis

|                                                                                                             |
|-------------------------------------------------------------------------------------------------------------|
| <b>Oligonucleotides for generation of FLAG-RIPK3 (pHM4730)</b>                                              |
| 5'CATATTAATTAAATGGACTACAAAGACGATGACGACAAGTCGTGCGTCAAGTTATGGC<br>3'CATAGTCGACTTATTTCCCGCTATGATTATAC          |
| <b>Oligonucleotides for generation of RIPK3-MYC (pHM5136)</b>                                               |
| 5'CATAAAGCTTATGTCGTGCGTCAAGTTAT<br>3'CATACTCGAGTTACAGATCCTCTTCTGAGATGAGTTTTTGTCTTTCCCGCTATGATTATAC          |
| <b>Oligonucleotides for generation of FLAG-RIPK3 aa1-518 (pHM5304)</b>                                      |
| 5'CATAATCGATATGTCGTGCGTCAAGTTATG<br>3'CATACTCGAGTTATTTCCCGCTATGATTATACC                                     |
| <b>Oligonucleotides for generation of FLAG-RIPK3 aa1-476 (pHM5305)</b>                                      |
| 5'CATAATCGATATGTCGTGCGTCAAGTTATG<br>3'CATACTCGAGTTAGTTGGGCAAGGCAGTTGT                                       |
| <b>Oligonucleotides for generation of FLAG-RIPK3 aa1-443 (pHM5306)</b>                                      |
| 5'CATAATCGATATGTCGTGCGTCAAGTTATG<br>3' CATACTCGAGTTATGGATTGGCTCCGGGG                                        |
| <b>Oligonucleotides for generation of FLAG-RIPK3 aa1-355 (pHM5324)</b>                                      |
| 5'CATAATCGATATGTCGTGCGTCAAGTTATG<br>3'CATACTCGAGTTACTCTAGATTCAGTTTGTTTAGCCA                                 |
| <b>Oligonucleotides for generation of FLAG-MLKL (pHM5117)</b>                                               |
| 5'CATATTAATTAAATGGACTACAAAGACGATGACGACAAGGAAAATTTGAAGCATATTATCAC<br>3'CTAGTCTAGATTACTTAGAAAAGGTGGAGAGTT     |
| <b>Oligonucleotides for generation of FLAG-IE1 FL (pHM5156)</b>                                             |
| 5'CATAGGATCCATGGAGTCCTCTGCCAAGAG<br>3'CTAG TCTAGA TTA CTGGTCAGCCTTGCTTC                                     |
| <b>Oligonucleotides for generation of FLAG-IE1 aa1-382 (pHM5153)</b>                                        |
| 5'CATAGGATCCATGGAGTCCTCTGCCAAGAG<br>3'CTAG TCTAGA TTA CTCTTCCTCATCTGACTCCT                                  |
| <b>Oligonucleotides for detection of <i>MLKL</i> in RT</b>                                                  |
| 5'TTCACCCATAAGCCAAGGAG<br>3'GGATCTCCTGCATGCATTTT                                                            |
| <b>Oligonucleotides for generation of PCR product for generation of HCMV <math>\Delta</math>IE1 strains</b> |
| 57-75: 5'<br>AAAGATGTCCTGGCAGAACTCGGTAAGTCTGTTGACATGTATGTGATATAAGGATGACGACGATAAGTA<br>GGG                   |

57-76: 3'

TAGTTTACTGGTCAGCCTTGCTTCTAGTCACCATAGGGTGGGTGCTCTTGTATATCACATACATGTCAACA  
GACTTACCGAGTTCTGCCAGGACATCTTTCAACCAATTAACCAATTCTGATTAG

57-77: 5' AGGATGACGACGATAAGTAGGG

57-78: 3' TAGTTTACTGGTCAGCCTTG

**Oligonucleotides for PCR after second recombination and sequencing of HCMV  $\Delta$ IE1 strains**

5' ATGGAGTCCTCTGCCAAGAGA

3' GCGTGACACGTTTATTGAGTAGG

# Supplementary Figures S1 and S2

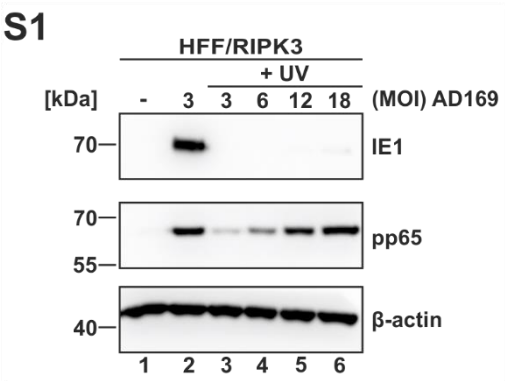

**Figure S1: UV-inactivation of AD169.** HFF/RIPK3 cells were infected with AD169 and UV-inactivated AD169 at MOIs 3 - 18 (UV-inactivation was conducted for 2 min with 0.12 J/cm<sup>2</sup>). Expression levels of IE1 and pp65 were monitored in Western blot analysis.  $\beta$ -actin served as internal loading control. The experiment was performed two times and one representative experiment is shown

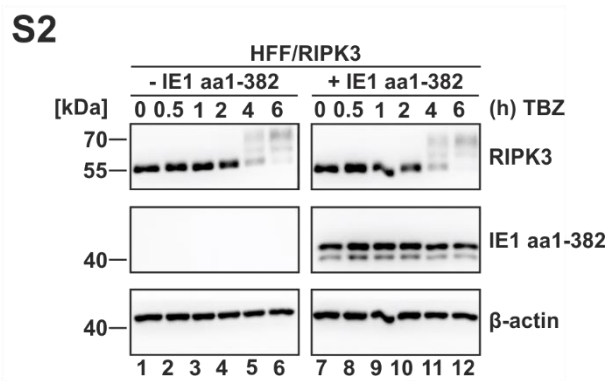

**Figure S2: The ubiquitination of RIPK3 is not promoted by the IE1 mutant IE1 aa1-382.** HFF/RIPK3 cells with inducible IE1 aa1-382 expression were treated with TBZ for indicated times and subsequently the levels of RIPK3 and MLKL were monitored in Western blot analysis. - IE1 aa1-382, no IE1 aa1-382 expression, + IE1 aa1-382, IE1 aa1-382 expression. The experiment was performed two times and one representative experiment is shown.
